# Supplementary material
Source: Springer Nature journal article supplement (https://www.springermedizin.de/resource/supplementary/12890_2009_149_MOESM3_ESM.pdf/9506090)

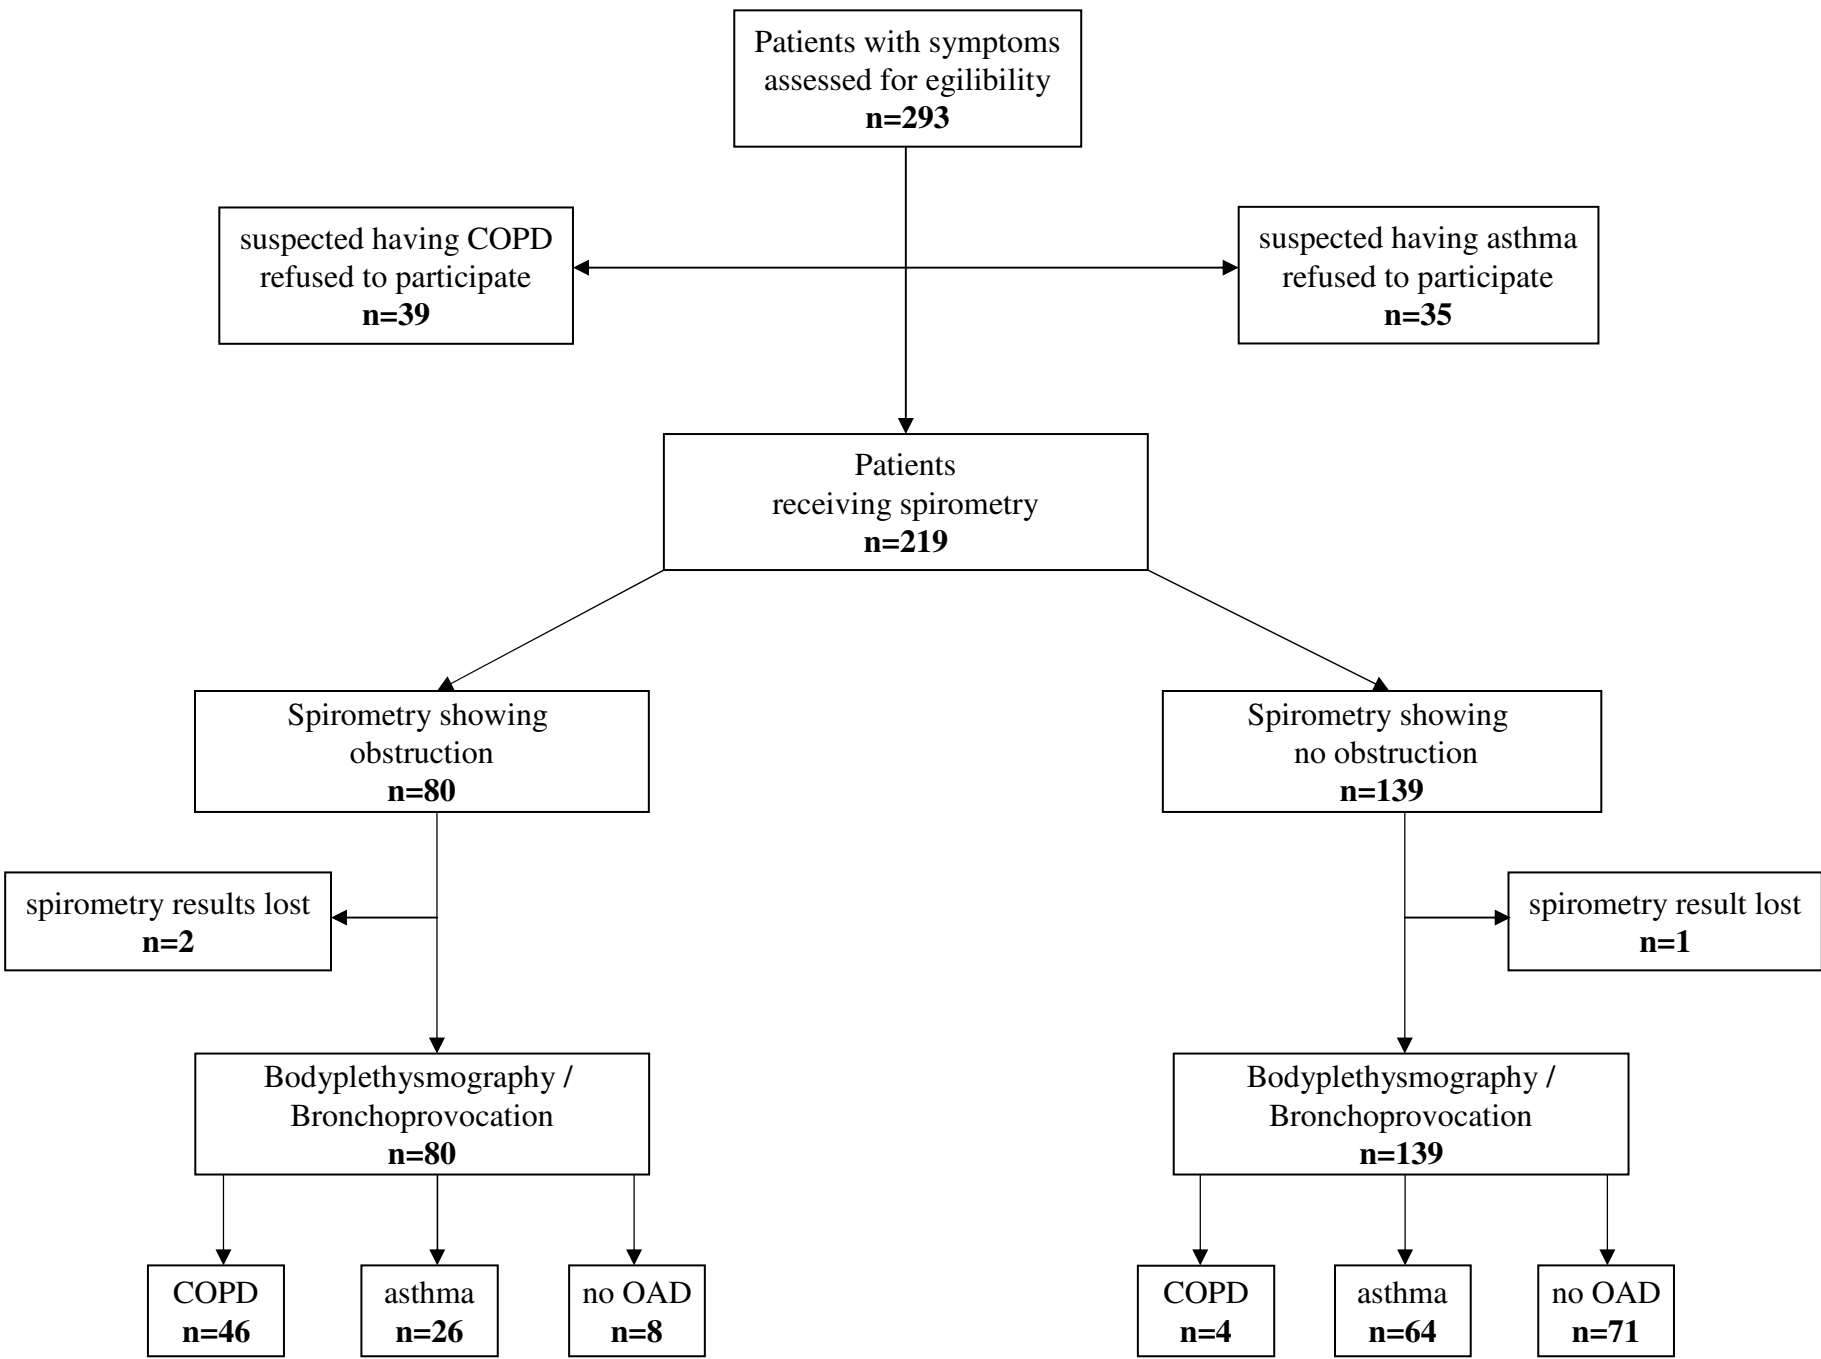

Supplement: MOESM3 [file 9506090]
